# Supplementary material
Source: Research Square preprint supplement (doi:10.21203/rs.3.rs-9543306/v1)

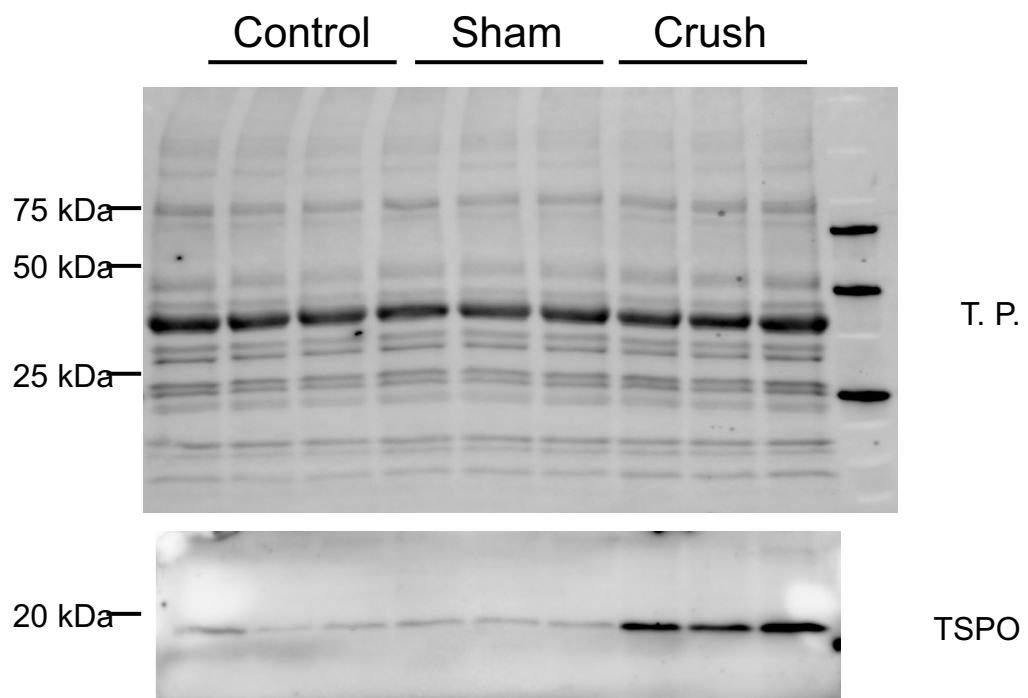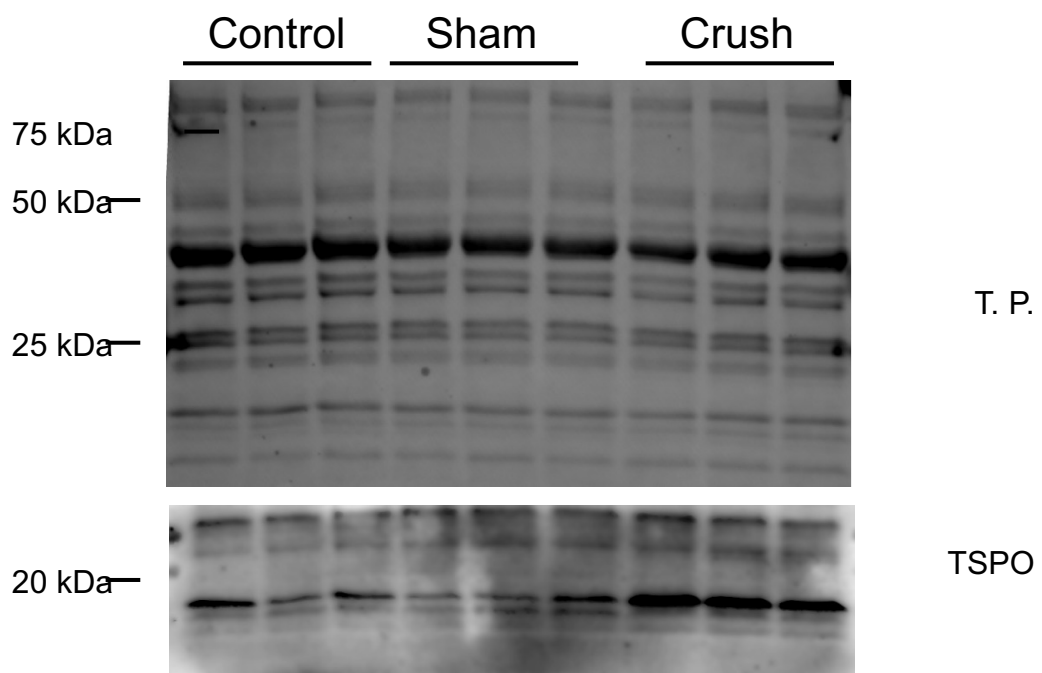

Supplement: Supplementary file 1 [file 4eb41b8d9a0d359897f16837.pdf]
